# Supplementary material
Source: publisher site journal article supplement (https://www.dovepress.com/article/405657)
Supplement: Supplementary file 1 [file get_supplementary_file.php]

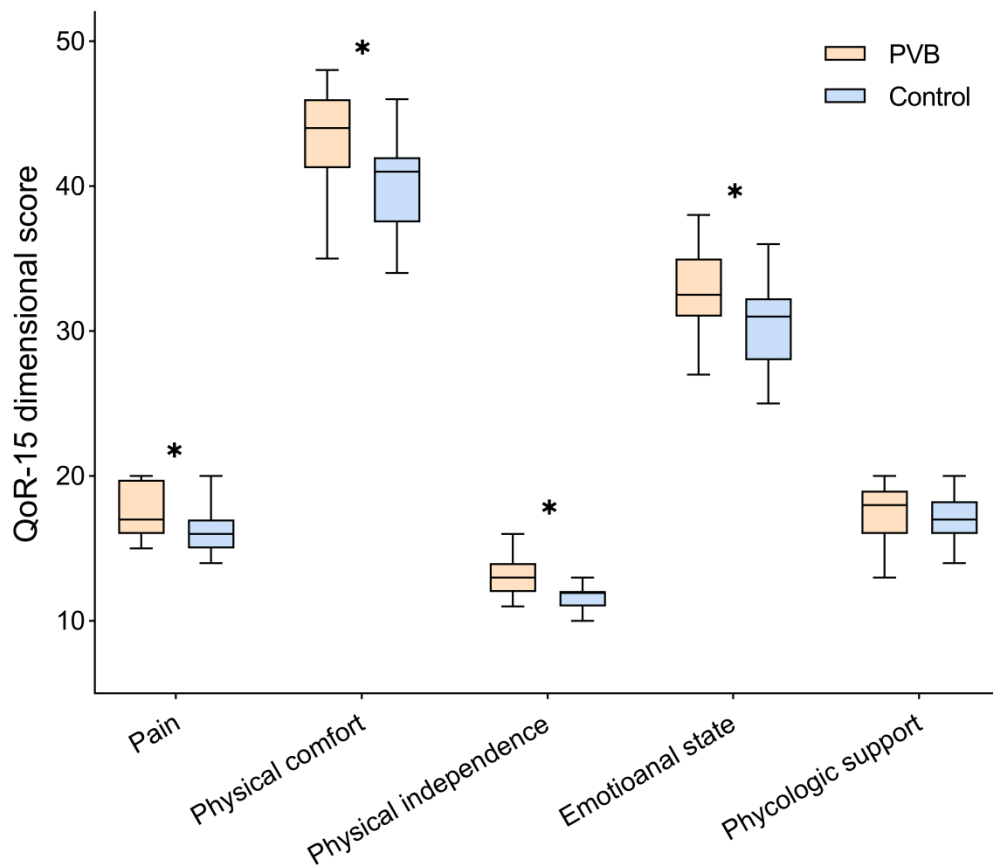

**Supplementary Figure 1** Box plots show the dimensions of the QoR-15 scores at 24 hours postoperatively.

**Note:** Horizontal lines within boxes represent medians, box edges represent 25th and 75th percentiles, and whiskers represent variability outside the interquartile range. Data were compared using the Mann–Whitney U test. Asterisks indicate statistical significance between the two groups ( $P < 0.05$ ).

**Abbreviations:** QoR-15, 15-item quality of recovery questionnaire; PVB, paravertebral block.
